# Supplementary material for: Myonuclear content and domain size in small versus larger muscle fibres in response to 12 weeks of resistance exercise training in older adults
Source: PubMed Central journal article supplement (PMC8047909; doi:10.1111/apha.13599), 2020-12-20
Supplement: APHA-231-e13599-s003.pdf [file APHA-231-e13599-s003.pdf]

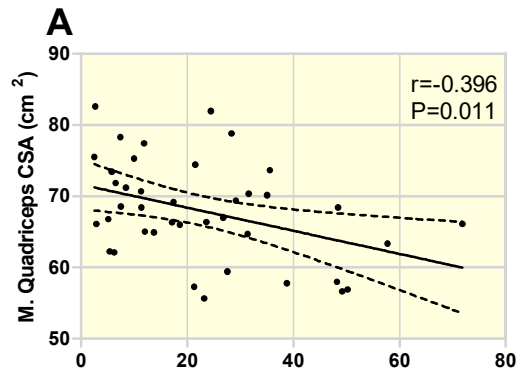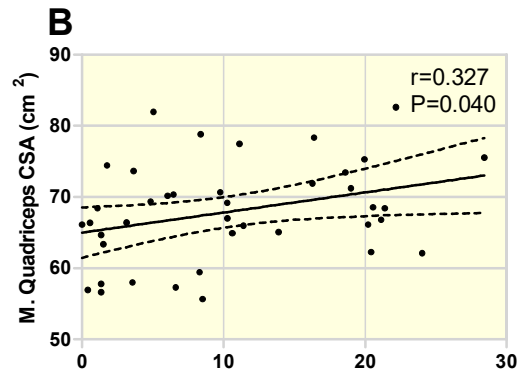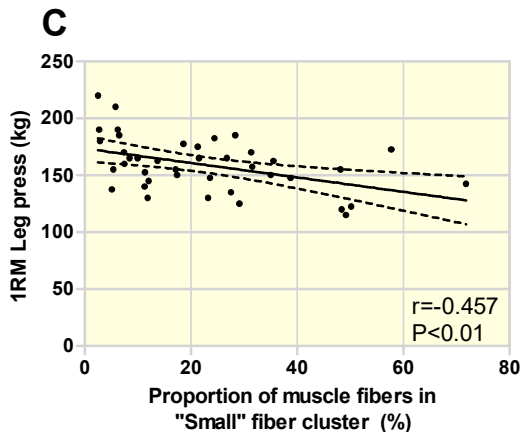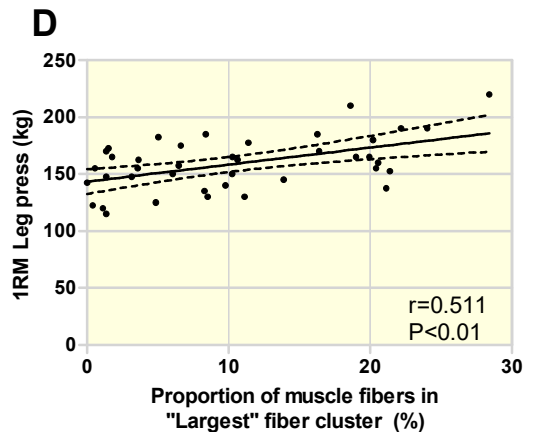

Supplemental figure 2: Scatter plots of the correlation analyses (Pearson's  $r$ ,  $n=40$ ) between the change in muscle Quadriceps cross-sectional area (CSA) (A-B) and 1RM leg press (C-D) and proportion (%) of muscle fibers within the "Small" (2000-3999  $\mu\text{m}^2$ ) or "Largest" (8000-9999  $\mu\text{m}^2$ ) muscle fiber size cluster in healthy older men. Solid line: regression line. Dotted line: ninety-five confidence interval.
